# Supplementary material
Source: publisher figshare collection journal article supplement (https://tandf.figshare.com/articles/dataset/_/21834260)

**Uninfected: Comp-gLASSO**

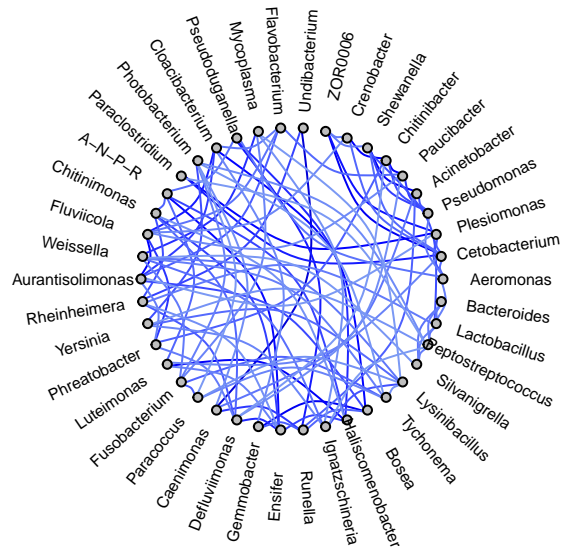

**Infected: Comp-gLASSO**

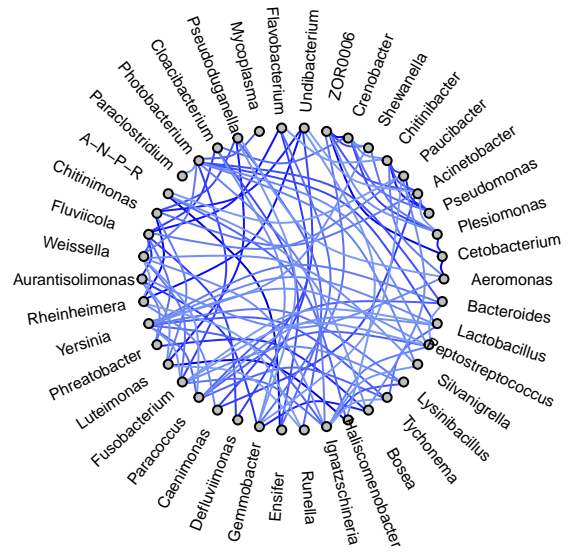

**Uninfected: gLASSO**

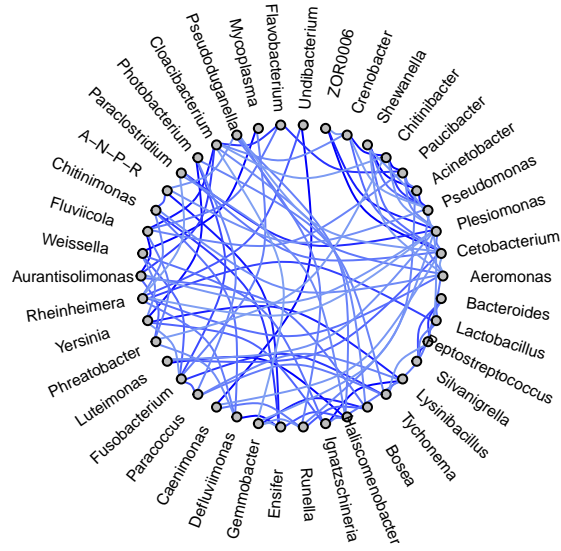

**Infected: gLASSO**

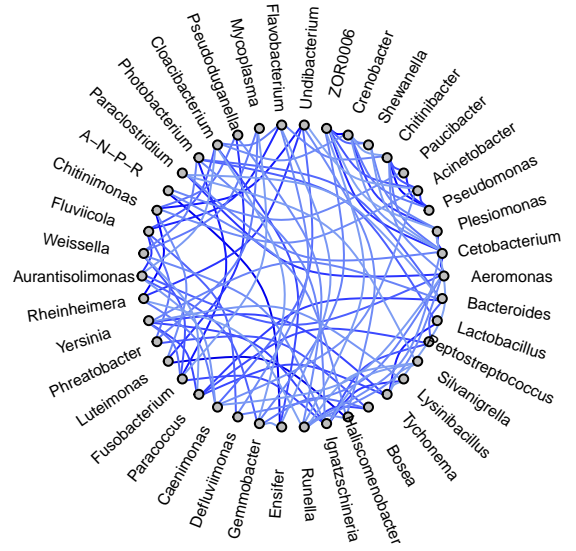

**Uninfected: MB**

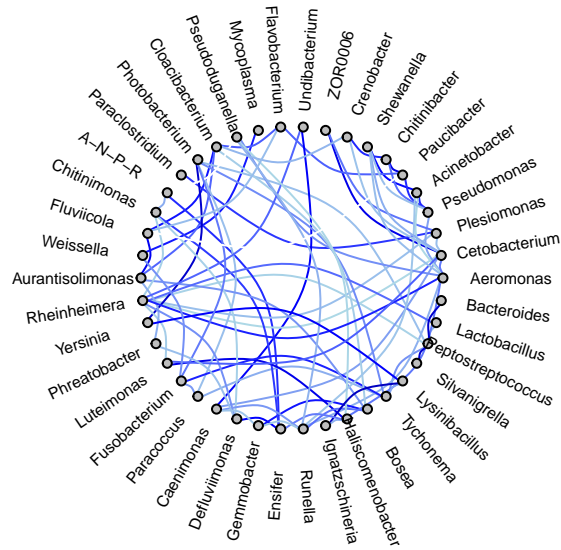

**Infected: MB**

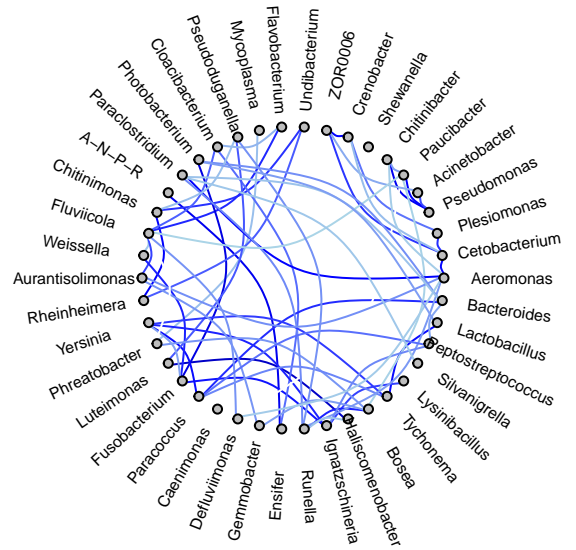

Supplement: Supplementary file 7 [file 1]
