# Supplementary material
Source: publisher figshare collection journal article supplement (https://tandf.figshare.com/articles/dataset/_/21834260)

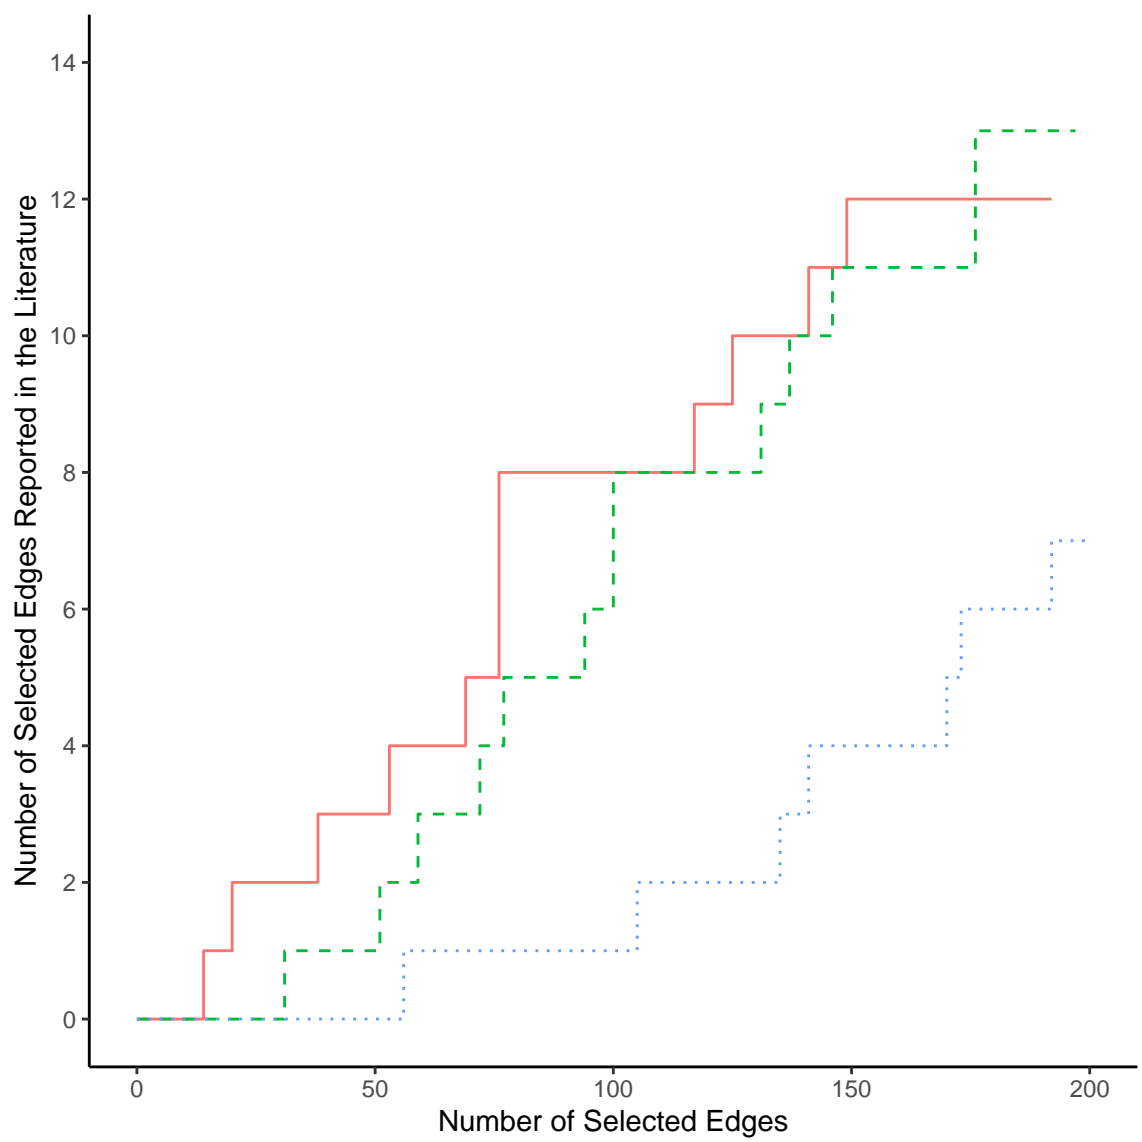

Supplement: Supplementary file 2 [file 1]

Literature

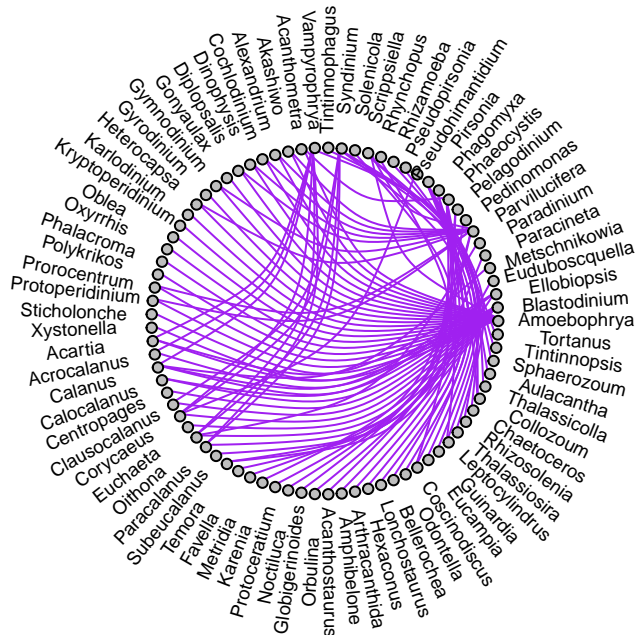

Comp-gLASSO

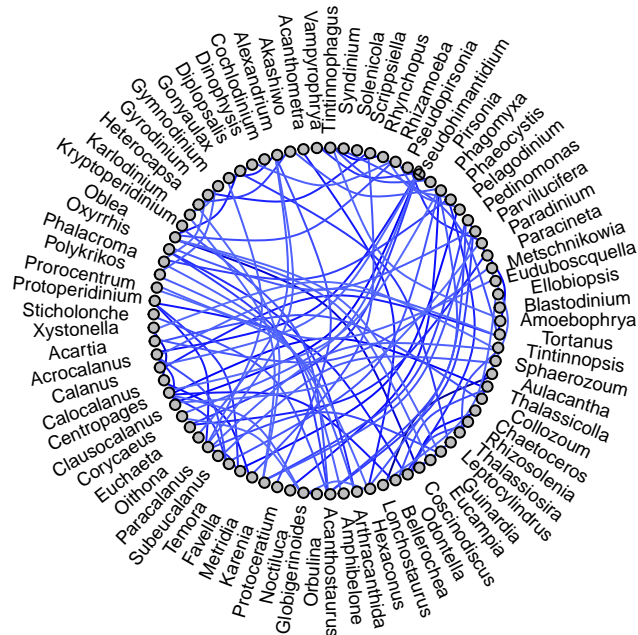

gLASSO

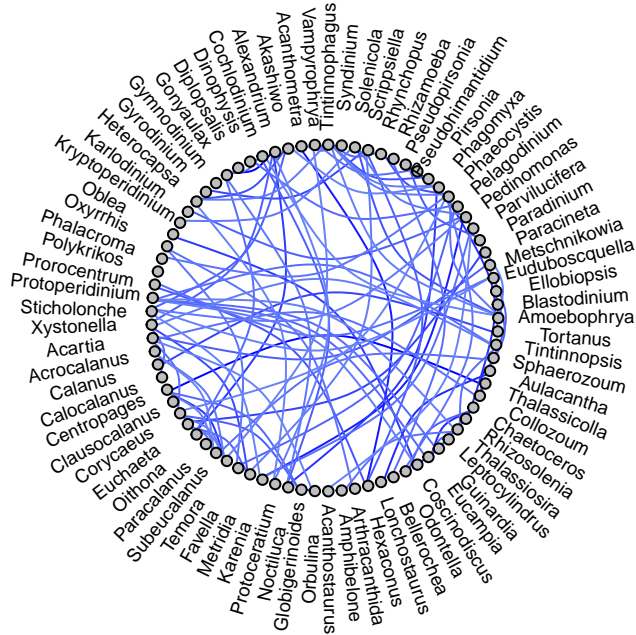

MB

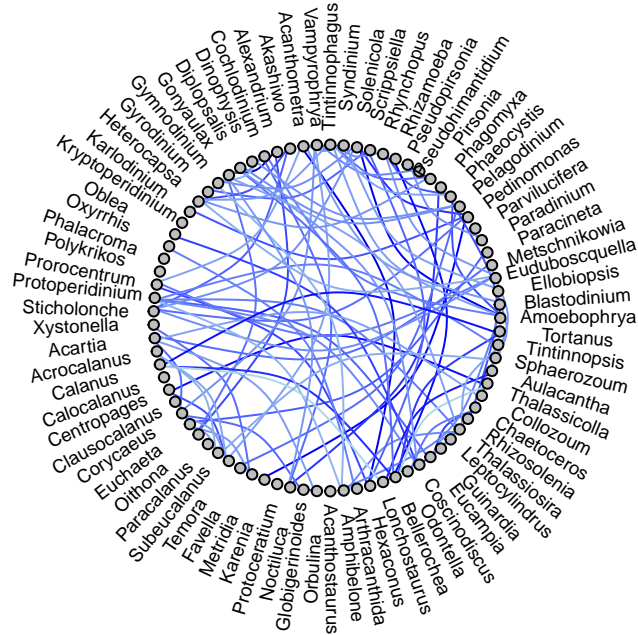

Supplement: Supplementary file 3 [file 1]

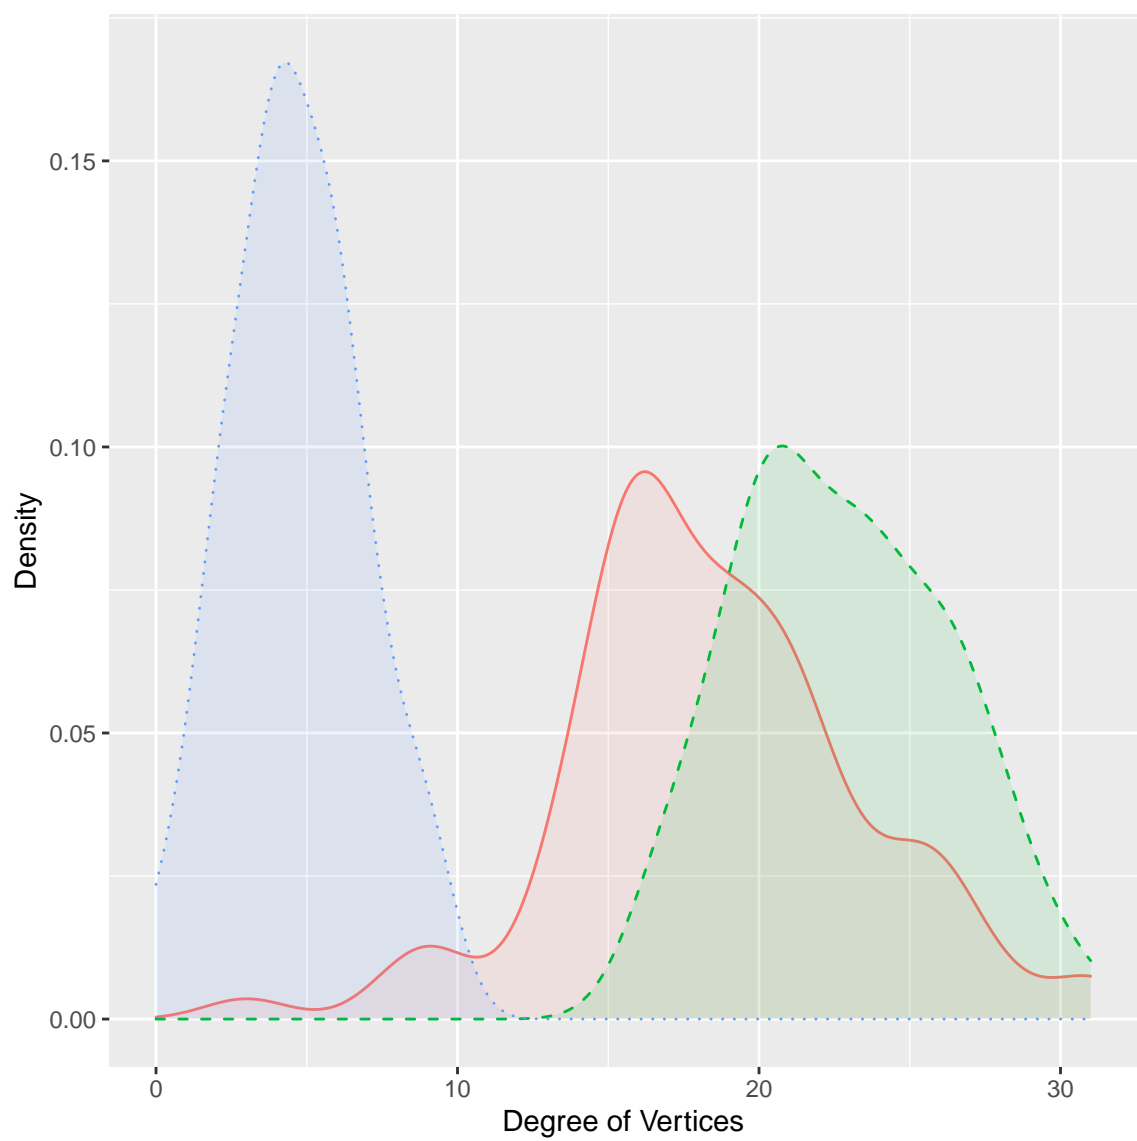

Supplement: Supplementary file 4 [file 1]

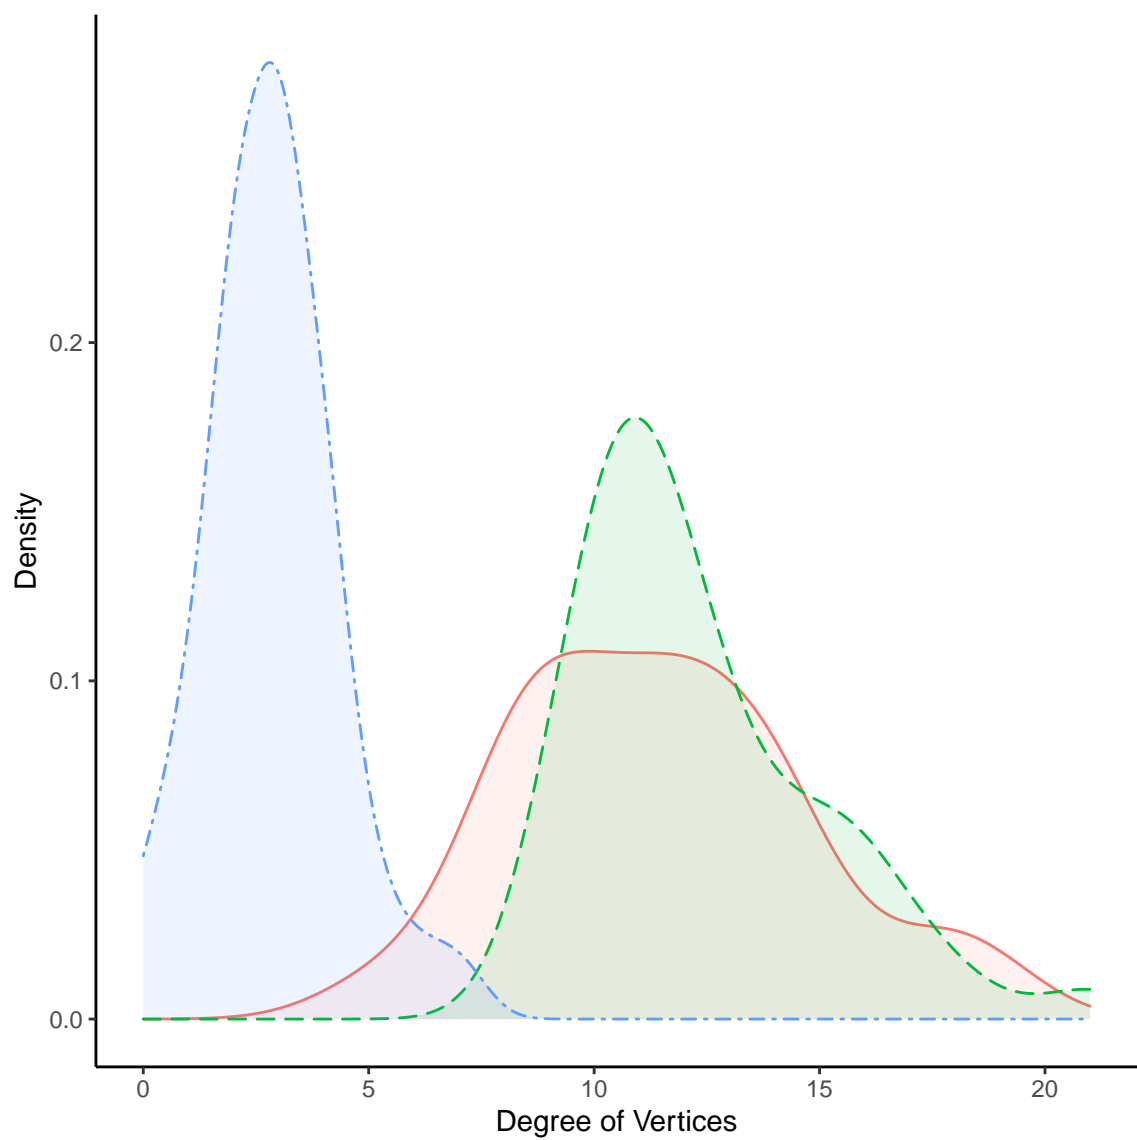

Supplement: Supplementary file 5 [file 1]

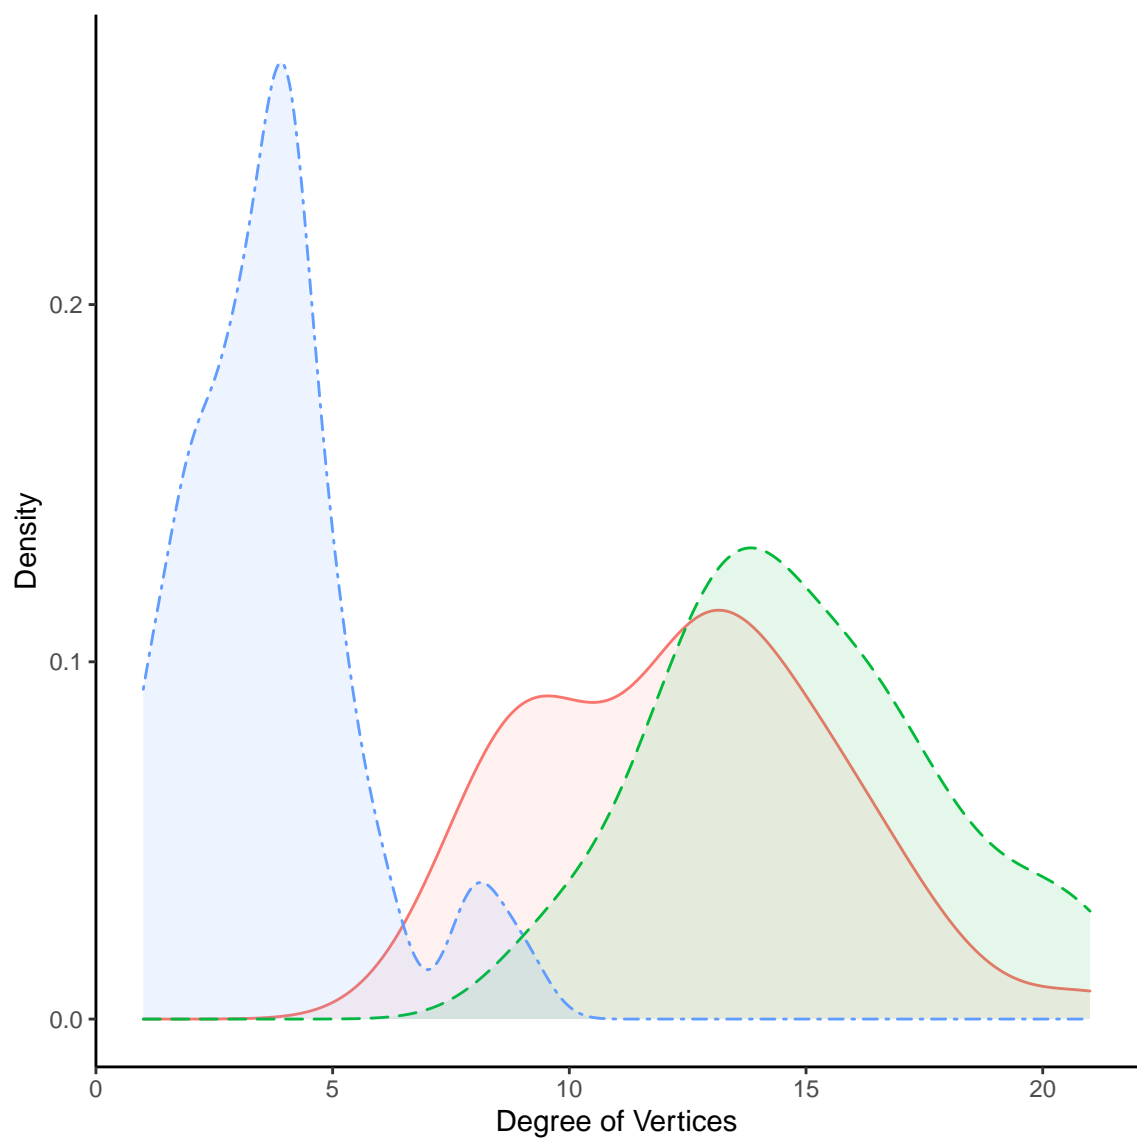

Supplement: Supplementary file 8 [file 1]
